# Supplementary material for: Carotenoids from Halophilic Archaea: A Novel Approach to Improve Egg Quality and Cecal Microbiota in Laying Hens
Source: Preprints.org preprint supplement (doi:10.20944/preprints202410.2447.v1), 2024-10-31
Supplement: Supplementary file 1 [file supplementary]

Table S1 16S rRNA gene amplification conditions

| Initial denaturation | Denaturation | Annealing | Extension | Extension |
| --- | --- | --- | --- | --- |
| 95℃ | 95℃ | 55℃ | 68℃ | 72℃ |
| 5 min | 40 s | 2 min | 2 min | 8 min |
| 1 cycle | 30 cycles | | | 1 cycle |

Table S2 Nutritional value of the basic feed

| Guaranteed value for product composition analysis (%) | | Raw Material |
| --- | --- | --- |
| Crude protein ≥ | 16.50 | Corn, Soya Meal, Bran, Corn protein powder, Calcium phosphate, Stone powder, Sodium chloride, Trace elements, Vitamins, amino acids, etc. |
| Crude fibre ≤ | 6.00 |
| Crude ash ≤ | 15.00 |
| Ca | 3.00-4.40 |
| P ≥ | 0.50 |
| NaCl | 0.15-0.80 |
| Methionine ≥ | 0.35 |
| H2O ≤ | 14.00 |
